# Supplementary material
Source: PubMed Central journal article supplement (PMC5071181)

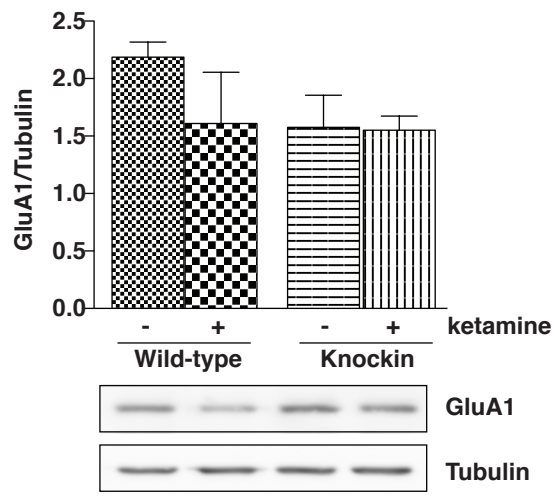

Supplement: NIHMS812889-supplement-Supp_Fig_S1.pdf [file NIHMS812889-supplement-Supp_Fig_S1.pdf]
